# Supplementary figures and images for: Dual role of BSA for synthesis of MnO2nanoparticles and their mediated fluorescent turn-on probe for glutathione determination and cancer cell recognition
Source: Royal Society of Chemistry journal article supplement (doi:10.1039/c8an02501k), 2019-01-01

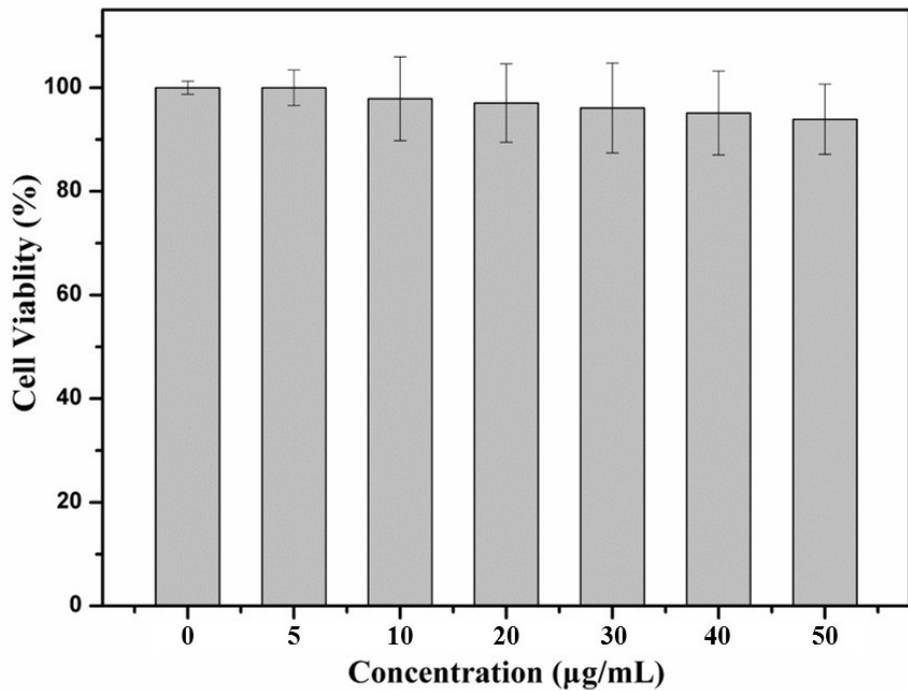

Supplement: c8an02501k10.pdf [file c8an02501k10.pdf]

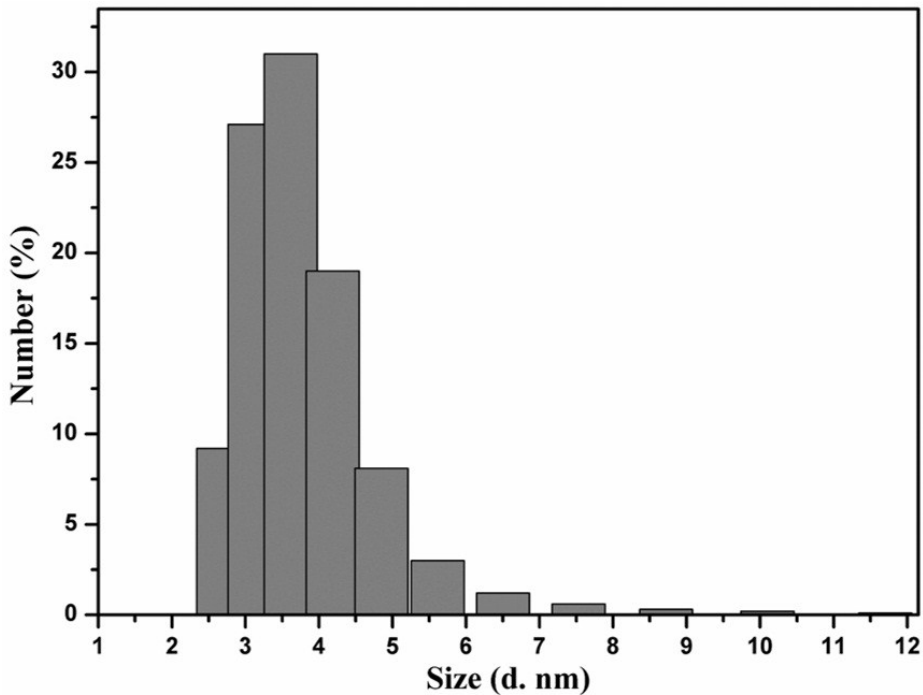

Supplement: c8an02501k4.pdf [file c8an02501k4.pdf]

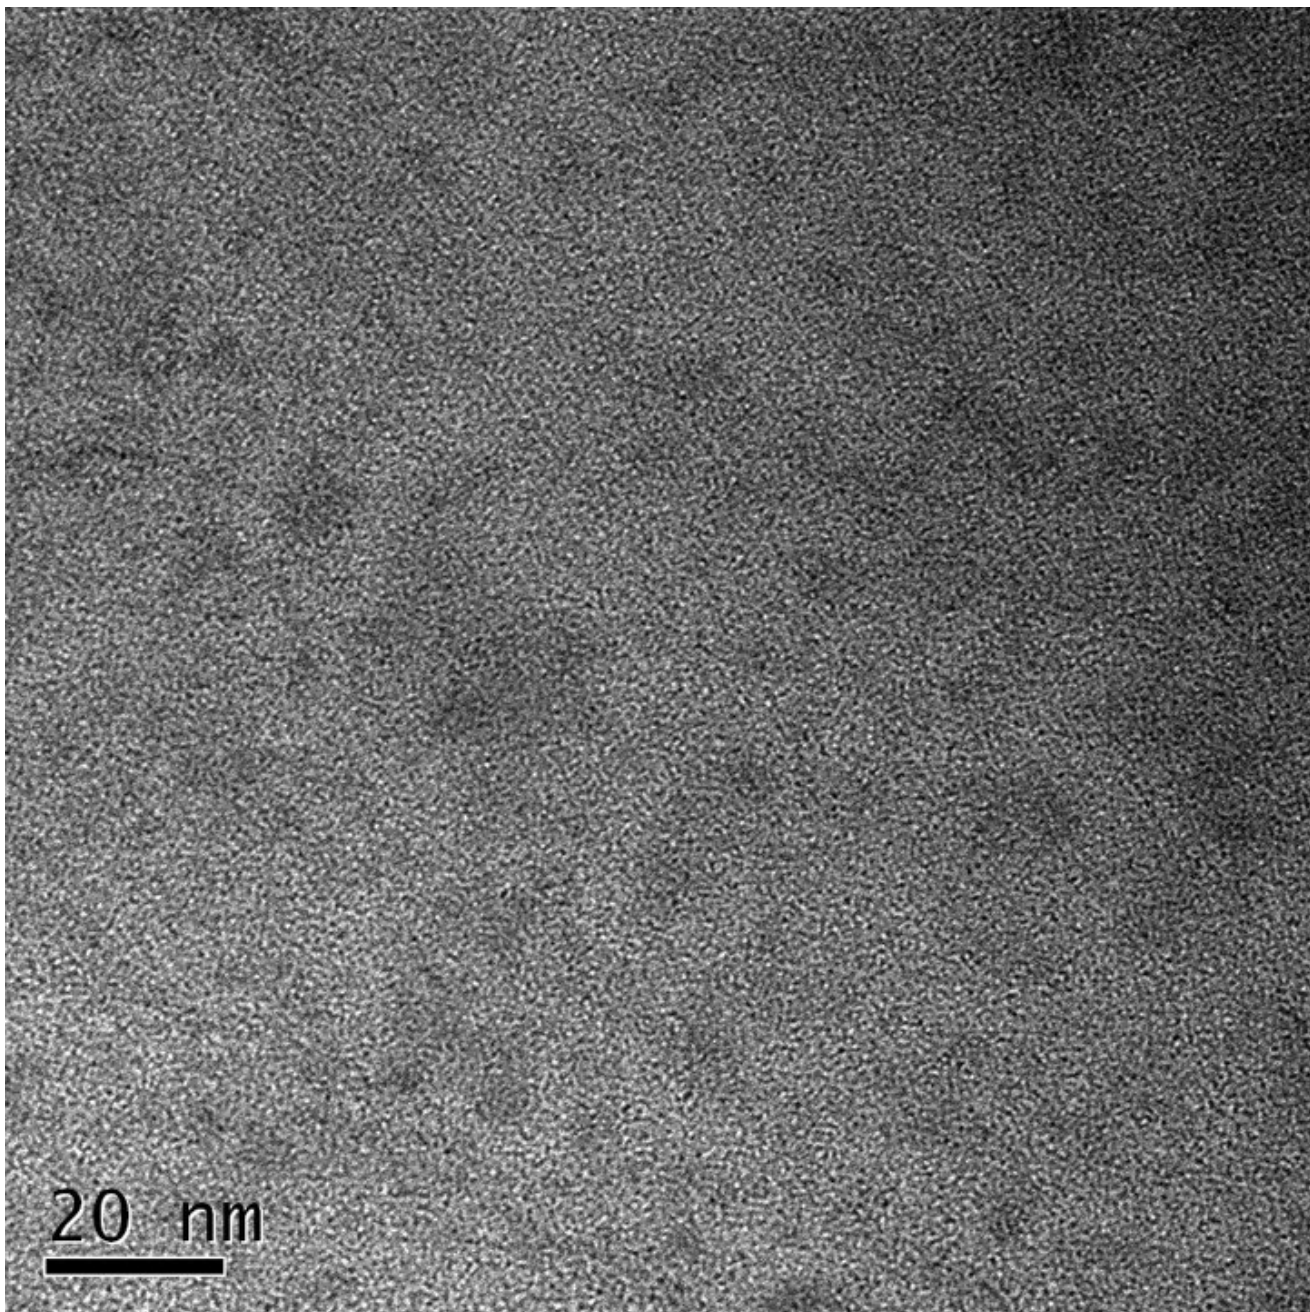

Supplement: c8an02501k5.pdf [file c8an02501k5.pdf]

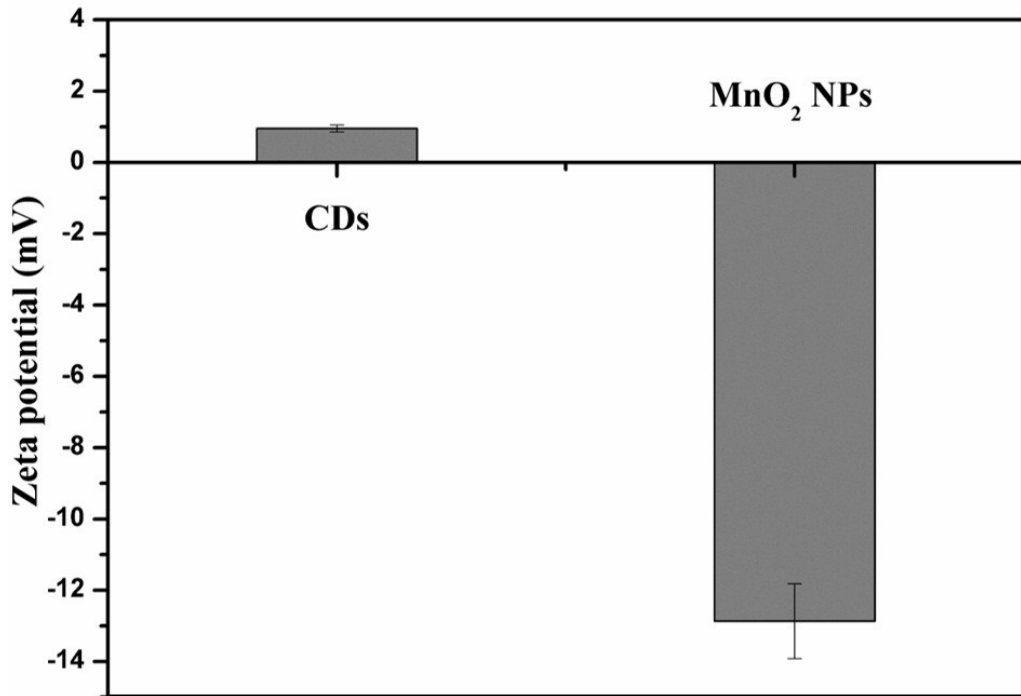

Supplement: c8an02501k6.pdf [file c8an02501k6.pdf]

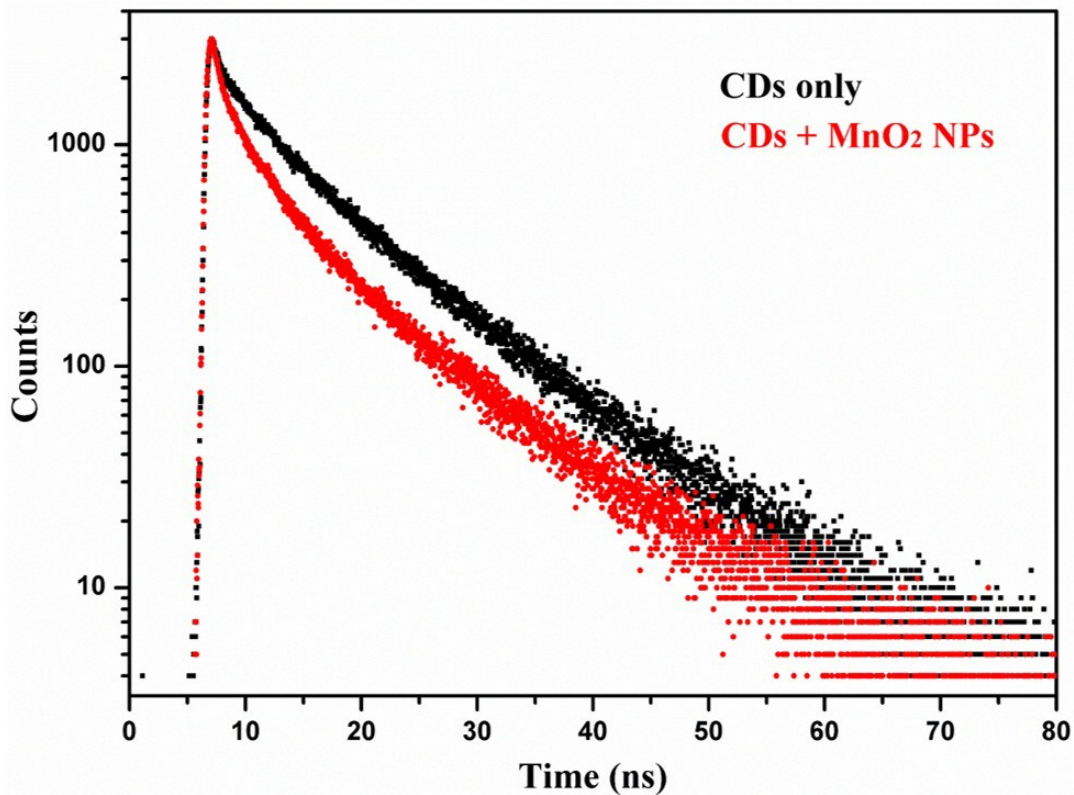

Supplement: c8an02501k7.pdf [file c8an02501k7.pdf]

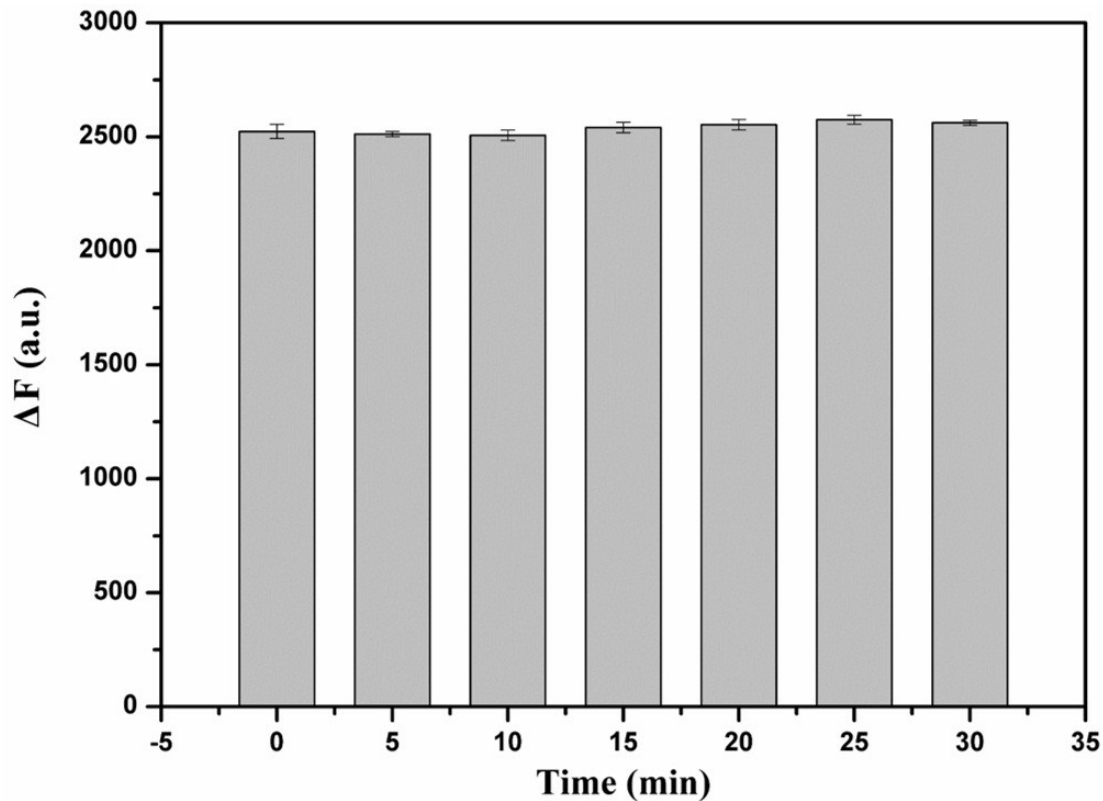

Supplement: c8an02501k8.pdf [file c8an02501k8.pdf]
